# Supplementary material for: A Novel Dual-Ion Capacitive Deionization System Design with Ultrahigh Desalination Performance
Source: MDPI journal article supplement (doi:10.3390/polym14214776), 2022-11-07
Supplement: s1 [file s1]

## **Supporting Information**

### **A novel dual-ion capacitive deionization system design with ultrahigh desalination performance**

Yuxin Jiang<sup>1</sup>, Zhiguo Hou<sup>2</sup>, Lvji Yan<sup>1</sup>, Haiyin Gang<sup>1</sup>, Haiying Wang<sup>1,3,4,\*</sup> and Liyuan Chai<sup>1,3,4</sup>

1 School of Metallurgy and Environment, Central South University, Changsha 410083, China

2 School of Chemistry and Materials, University of Science and Technology of China, Hefei, 230026, China

3 Chinese National Engineering Research Center for Control and Treatment of Heavy Metal Pollution, Changsha 410083, China

4 Water Pollution Control Technology Key Lab of Hunan Province, Changsha 410083, China

\* Correspondence: haiyw25@csu.edu.cn

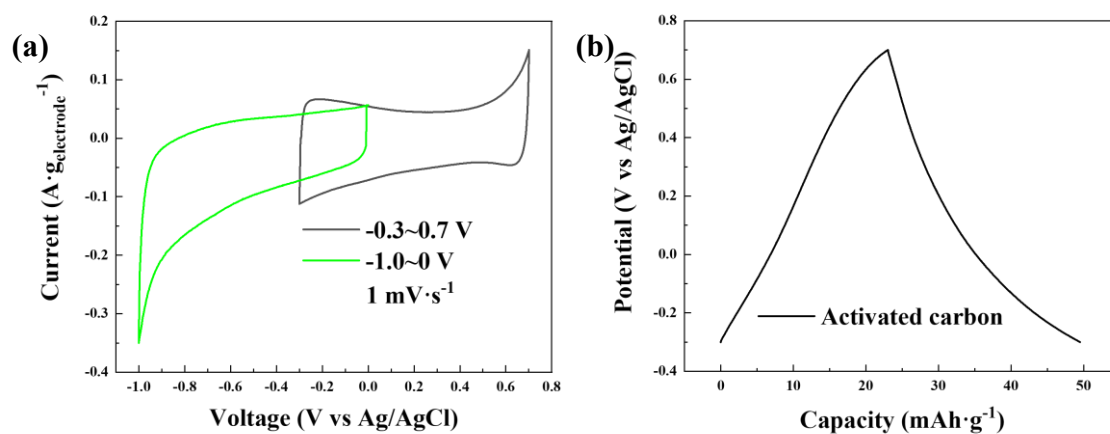

Figure S1. (a) Cyclic voltammetry profiles of activated carbon with different scan ranges and (b) the galvanostatic charge-discharge (GCD) curve of activated carbon (-0.3~0.7 V versus Ag/AgCl) with a current density of  $0.1 \text{ A} \cdot \text{g}^{-1}$  in 1.0 M NaCl solution.

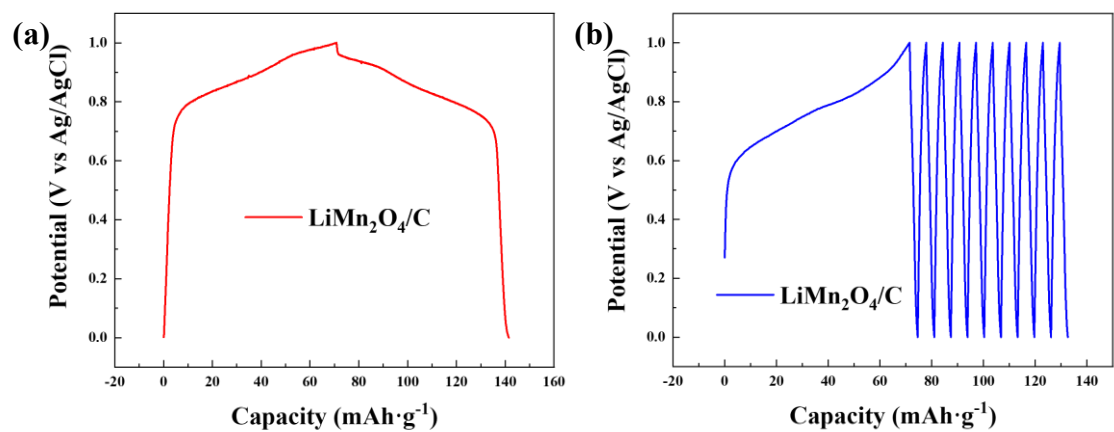

Figure S2. GCD curves of  $\text{LiMn}_2\text{O}_4/\text{C}$  ( $0.1 \text{ A} \cdot \text{g}^{-1}$ ) in (a)  $1.0 \text{ M LiCl}$  solution and (b)  $1.0 \text{ M NaCl}$  solution.

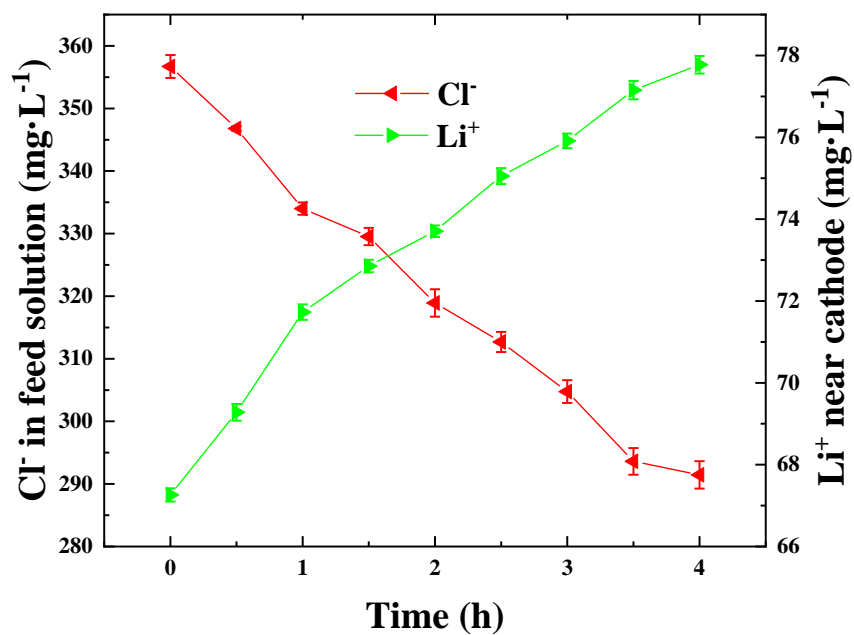

Figure S3. The concentration variations of lithium ions near the cathode and chloride ions in the feed solution during CDI desalination at 1.8 V with the initial salt concentration of 10 mM.
